# Supplementary material
Source: publisher figshare collection journal article supplement (https://acs.figshare.com/ndownloader/files/4650733)
Supplement: Supplementary file 1 [file 4650733]

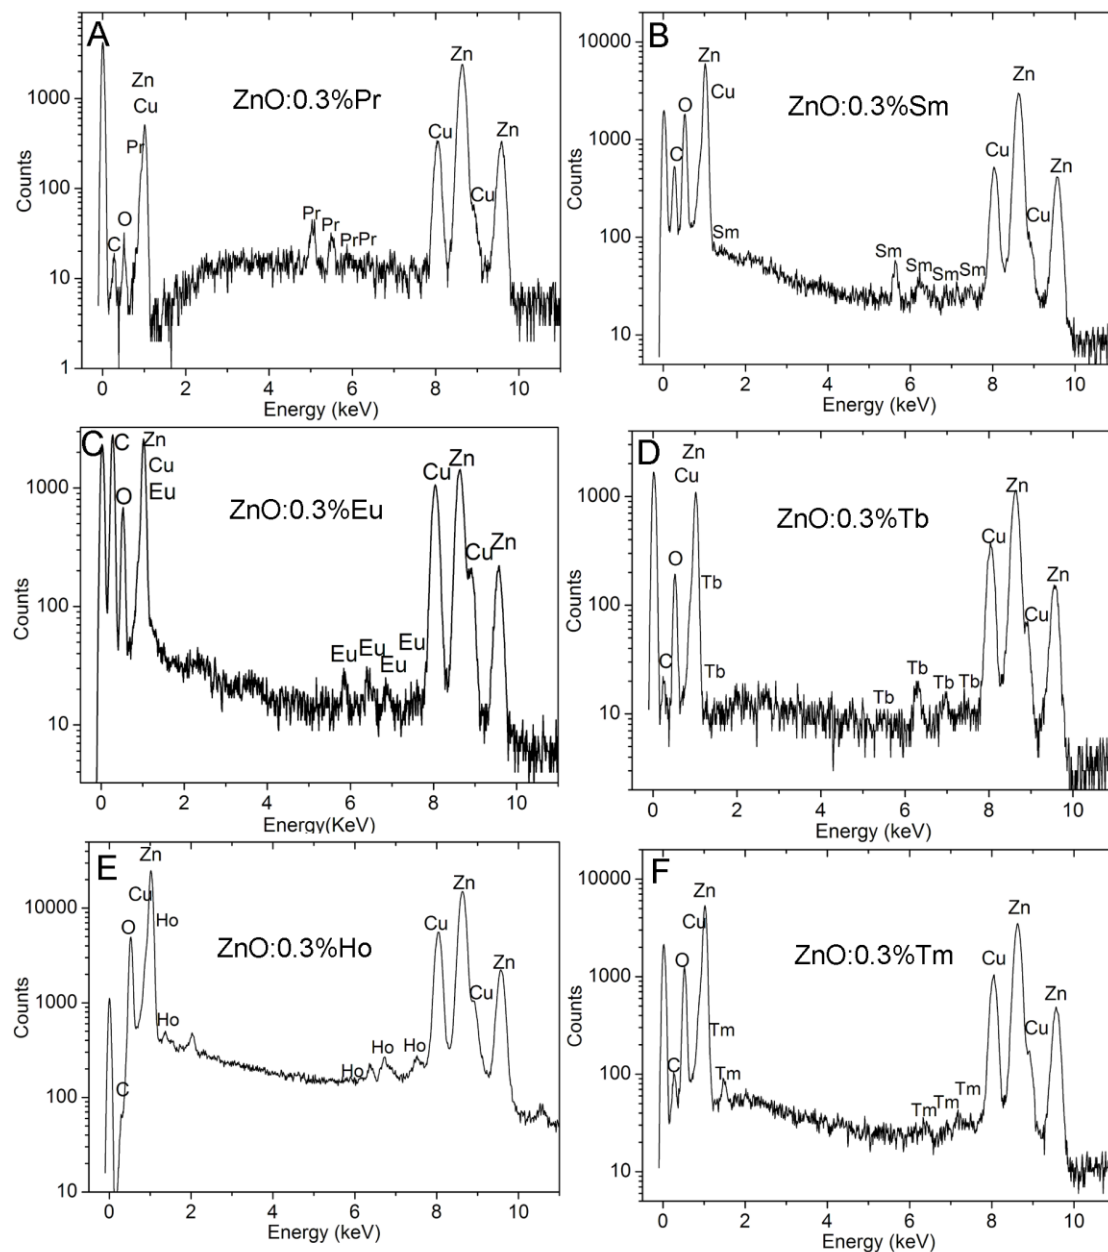

**Figure S1.** Typical energy dispersive X-ray (EDX) spectra of single ZnO:RE (RE=Pr, Sm, Eu, Tb, Ho, Tm) nanosheet. The signals were recorded on the transmission electron microscope (TEM, JEOL 2010, 200kV).
